# Supplementary material
Source: MDPI journal article supplement (https://www.mdpi.com/2218-6581/11/6/121)
Supplement: s1 [file s1]

Archive with 3 entries (3 files):
- germ-free robotic friends_data.csv
- germ-free robotic friends_spss_syntax.txt
- Supplementary Material Germ-free robotic friends.pdf
