# Supplementary material
Source: MDPI journal article supplement (https://www.mdpi.com/2218-6581/11/6/121)
Supplement: s1 [file s1 › germ-free robotic friends_data.csv]

consent	PA1	PA2	PA3	PA4	PA5	MP5	NA1	MP6	NA2	NA3	NA4	NA5	MP1	MP2	MP3	MP4	minutes	sublength	int_conv	SD1	SD2	SD3	SD4	SD5	SD6	SD7	SD8	SD9	SD10	SD11	SD12	SD13	SD14	SD15	SD16	joyful1	joyful2	joyful3	imag1	imag2	imag3	imag4	mpag1	mpex1	mpex2	mpag2	mpex3	mpag3	mpex4
1	4	4	4	3	4	2	6	2	3	6	4	5	6	7	7	6	30	4	5	7	5	7	7	7	6	7	6	4	5	7	7	6	5	4	7	6	6	7	4	5	5	5	5	5	5	6	3	4	2
1	3	4	5	3	3	5	1	6	1	1	2	1	1	1	1	1	20	4	4	7	4	7	7	7	5	5	2	7	2	7	4	3	7	3	4	5	3	3	4	4	3	2	1	1	1	7	1	7	1
1	1	2	7	3	3	3	3	4	3	2	4	1	1	1	2	1	5	1	4	5	3	5	5	5	5	5	2	3	5	5	5	2	4	3	4	1	1	2	7	1	1	1	3	5	2	2	2	4	2
1	1	1	3	2	2	1	5	1	5	7	4	6	3	2	6	5	20	6	6	7	6	5	7	6	6	6	3	3	4	7	4	3	3	2	7	6	5	5	4	6	5	3	6	7	2	5	2	2	1
1	6	5	6	2	5	5	1	5	1	1	1	1	1	2	1	1	20	4	5	7	5	7	7	7	5	5	3	7	5	7	7	5	3	5	7	5	4	5	4	4	3	3	3	5	3	6	3	7	2
1	4	1	3	2	7	4	1	3	1	1	1	2	1	1	1	1	10	2	4	4	2	3	2	3	2	1	2	3	4	3	5	3	3	2	3	2	1	2	6	2	1	2	1	1	1	7	1	7	1
1	1	7	3	3	2	2	6	1	2	1	6	2	6	6	7	1	15	3	7	7	6	7	7	7	7	7	7	7	6	7	7	7	7	7	7	7	5	6	5	2	2	2	5	1	1	7	1	7	1
1	2	5	4	5	3	2	4	4	2	2	5	4	2	2	4	4	15	4	2	4	2	4	4	3	2	4	1	2	1	3	2	1	1	2	3	2	1	1	5	2	1	2	2	4	1	1	1	2	2
1	4	4	5	2	4	6	1	5	1	1	4	1	1	1	1	1	45	5	6	7	6	7	7	7	5	7	7	5	6	7	7	7	6	5	7	5	4	4	2	6	5	5	6	4	3	6	2	3	1
1	6	4	7	6	7	1	4	2	2	4	4	2	2	3	4	3	10	4	5	5	3	6	6	5	5	5	4	3	5	6	7	5	3	4	5	6	4	5	3	5	2	4	4	3	5	6	3	3	3
1	5	2	4	5	4	5	1	6	1	1	1	1	1	1	1	4	60	4	5	5	7	5	5	7	7	7	4	7	4	7	7	5	7	7	7	7	4	4	2	3	4	2	1	1	1	1	1	1	1
1	2	3	3	2	2	2	5	1	2	5	5	4	6	5	5	6	210	7	6	5	5	4	6	6	6	5	4	6	5	7	7	4	5	4	6	7	5	6	5	3	3	4	6	5	1	7	3	6	2
1	7	7	7	7	7	7	1	6	1	1	1	1	1	1	1	1	5	4	5	7	7	7	7	7	7	7	7	7	7	7	7	7	7	7	7	6	5	6	2	5	4	5	6	6	3	5	2	6	1
1	6	4	6	3	6	6	1	6	1	1	5	2	1	1	1	1	30	5	6	7	7	7	7	7	6	7	6	6	7	7	6	7	7	6	7	6	4	5	4	5	3	4	3	3	2	7	3	4	3
1	2	4	6	5	5	1	1	3	1	1	4	1	2	4	1	1	5	2	1	3	2	5	5	5	2	3	2	2	2	3	2	3	1	3	3	2	1	1	3	5	5	5	1	1	1	7	1	6	1
1	3	2	3	3	6	3	2	3	2	4	4	3	6	6	7	6	60	6	5	6	5	6	7	5	6	3	5	5	5	6	4	4	5	6	6	6	5	6	3	5	4	5	4	2	2	5	3	3	2
1	6	6	5	4	2	4	2	2	1	1	5	3	1	1	2	1	45	3	6	4	1	3	2	6	5	2	3	2	2	5	5	4	1	1	5	4	3	5	2	5	6	5	3	5	1	7	1	5	1
1	2	2	4	4	4	2	5	3	3	1	1	2	5	5	6	6	30	5	6	7	4	7	7	7	6	4	5	4	5	7	7	6	4	5	6	6	4	5	2	5	5	6	1	5	1	7	1	5	1
1	3	3	4	5	2	2	5	3	5	4	6	2	5	2	5	5	45	3	3	4	1	4	7	4	2	5	1	2	1	5	1	2	2	1	4	5	3	5	2	4	6	4	5	1	3	6	1	6	1
1	6	5	6	3	6	6	5	4	2	6	6	6	5	3	4	3	180	7	6	7	7	7	7	7	7	7	7	7	6	7	7	6	7	7	6	7	7	7	1	7	5	4	6	2	3	7	3	5	3
1	5	4	4	5	4	4	4	5	2	1	4	1	1	1	1	1	20	4	2	5	2	4	4	4	3	4	3	2	1	4	2	2	1	2	3	4	3	3	2	4	3	3	2	1	1	2	1	1	1
1	7	6	4	6	3	7	1	5	1	1	1	2	1	1	2	1	50	5	5	4	5	7	5	6	6	5	5	5	6	6	7	6	6	4	5	7	7	7	2	6	6	4	6	7	1	6	3	7	3
1	2	2	4	4	6	5	1	4	1	1	4	1	1	5	1	1	5	3	5	5	6	6	3	6	6	6	6	7	7	7	7	5	6	6	7	7	6	7	5	5	5	5	6	7	5	6	3	4	3
1	2	3	2	2	2	2	2	2	1	2	2	5	5	6	4	5	15	4	4	6	4	5	6	6	3	6	3	3	3	6	6	4	2	3	4	2	2	2	4	2	2	2	1	2	2	3	1	2	2
1	4	5	6	3	7	2	3	2	1	2	3	1	5	4	1	1	15	4	6	7	3	7	7	7	6	7	6	6	6	7	7	4	5	6	7	6	4	4	2	5	6	5	3	6	1	5	2	2	1
1	5	3	5	5	5	3	2	2	4	2	3	1	1	2	3	5	30	3	2	6	2	6	5	6	2	6	2	2	2	5	4	3	2	3	4	6	2	4	2	6	3	5	5	2	1	7	1	5	1
1	6	6	7	4	6	7	2	7	1	1	1	1	1	1	1	1	15	4	2	6	2	7	6	4	3	7	2	5	1	4	3	3	3	3	5	3	3	3	3	5	5	5	2	2	1	6	1	2	1
1	4	5	6	4	6	4	1	6	1	4	1	1	7	2	2	1	3	2	3	7	6	7	7	7	6	7	2	5	2	7	7	5	4	2	7	4	4	4	5	3	3	3	1	1	1	7	1	7	1
1	5	4	4	4	5	6	1	5	1	1	1	1	1	1	1	1	30	5	1	6	5	7	7	6	5	7	1	3	2	6	5	4	1	1	5	5	4	5	3	5	5	5	1	1	1	6	1	5	1
1	4	4	4	3	7	3	3	2	1	5	7	5	6	5	5	5	20	3	5	7	6	7	7	7	7	7	5	6	4	7	7	7	3	5	7	5	4	5	5	3	3	4	5	1	2	6	1	5	2
1	4	4	3	1	3	7	1	7	1	1	1	1	1	1	1	1	30	5	5	7	5	7	7	7	6	7	5	6	3	7	7	6	5	5	7	5	2	5	4	3	4	3	5	6	4	7	2	7	2
1	2	3	3	2	4	3	1	3	1	4	3	3	5	5	5	5	30	4	1	6	4	6	5	4	5	5	4	5	4	5	5	5	5	4	5	5	3	4	4	4	4	3	1	1	1	3	1	5	1
1	5	5	6	4	6	6	1	5	1	1	1	1	1	1	1	1	30	5	1	5	1	4	5	5	5	5	1	1	1	1	5	1	1	1	1	4	3	3	1	6	4	5	4	1	1	7	1	6	1
1	3	1	2	2	3	2	6	2	5	1	6	1	6	6	6	7	60	5	6	7	6	7	7	7	2	7	3	7	2	7	7	6	3	6	6	3	3	2	2	2	2	1	1	1	1	7	1	6	1
1	6	6	5	5	6	7	1	7	1	1	4	1	1	1	1	1	45	4	5	5	6	6	7	7	7	6	4	7	7	7	7	6	5	3	7	7	6	7	3	5	2	5	5	2	2	7	1	7	1
1	5	4	5	4	5	2	2	1	1	1	1	1	1	1	1	3	30	5	5	7	7	7	7	7	7	6	5	5	4	7	5	7	7	5	7	6	4	6	1	6	6	5	4	4	4	7	4	6	4
1	5	4	5	4	5	6	1	7	1	1	1	1	1	1	1	1	20	3	5	2	3	4	1	3	4	5	2	4	3	5	5	5	1	3	5	2	1	1	6	1	2	1	1	3	1	1	1	1	1
1	5	7	6	4	7	3	1	2	1	1	1	3	3	1	2	1	30	5	6	7	7	7	7	7	5	7	3	5	4	7	3	7	5	6	7	7	4	5	1	7	4	7	3	4	3	7	2	5	5
1	4	1	3	1	4	6	1	7	1	1	3	1	1	1	1	4	10	3	3	4	3	6	4	4	4	6	4	3	3	4	3	3	3	3	5	4	1	3	1	5	3	4	2	3	1	3	1	4	2
1	7	4	7	7	3	5	2	5	2	1	1	1	2	4	3	3	5	2	1	5	4	4	6	5	4	3	1	6	1	3	2	2	1	1	6	1	1	1	5	2	2	1	1	1	1	7	1	5	1
1	2	1	5	3	4	1	2	1	1	5	1	5	7	7	6	7	60	7	7	7	4	7	7	7	7	4	3	5	7	7	7	4	4	3	7	7	2	5	3	5	3	3	2	1	1	7	1	6	1
1	5	4	5	4	6	5	1	5	2	1	2	1	2	2	1	1	120	4	3	6	4	6	7	7	7	6	2	6	4	6	7	6	4	3	7	6	4	2	6	3	2	2	2	5	2	7	1	2	2
1	6	4	5	2	3	7	1	1	1	1	1	1	1	1	1	1	5	2	3	5	3	5	6	5	6	5	4	5	3	5	7	5	2	3	5	3	2	4	5	6	5	6	3	3	1	7	1	7	1
1	6	5	7	5	5	6	1	6	1	1	1	2	1	1	3	1	5	2	2	6	4	7	5	6	4	6	1	2	1	5	3	3	2	2	6	4	2	4	1	5	5	5	2	2	1	3	1	3	1
1	1	5	2	2	2	1	5	1	5	6	3	2	1	1	6	7	5	4	3	4	2	5	5	5	3	4	2	5	2	5	5	3	2	4	5	5	3	4	6	2	2	2	2	2	1	7	1	7	1
1	6	5	7	3	6	6	1	7	1	1	1	1	1	2	1	1	5	1	4	4	1	4	4	4	2	3	1	2	1	2	4	1	1	1	2	2	1	1	6	1	1	1	1	1	1	4	1	5	1
1	5	3	5	6	5	6	1	6	2	2	2	2	2	1	2	3	2	2	3	4	3	3	3	3	2	4	3	3	2	3	3	3	3	2	3	4	3	3	3	3	2	3	4	4	3	3	3	3	3
1	2	2	3	2	3	3	5	3	1	1	2	2	5	3	2	2	5	2	1	4	2	4	3	2	2	5	1	3	2	4	2	2	2	2	2	2	1	1	2	5	2	2	3	2	2	3	1	4	1
1	5	5	5	3	6	5	1	5	1	2	3	5	5	5	1	4	5	2	2	6	3	6	6	6	5	5	1	3	4	3	7	3	1	1	6	4	2	4	3	5	5	3	6	6	1	7	1	7	2
1	5	6	5	7	7	6	2	6	1	1	2	1	1	1	1	1	80	5	3	7	3	7	7	7	7	7	4	5	5	7	6	1	3	2	6	6	4	5	1	6	6	6	6	6	2	7	1	7	1
1	3	5	5	5	4	4	1	2	1	1	2	1	1	2	1	2	45	5	6	3	3	7	3	7	6	7	5	7	5	3	7	5	7	5	7	6	6	6	1	6	6	6	7	6	5	7	5	3	4
1	6	6	5	6	6	7	1	6	1	1	2	1	1	1	1	2	10	4	1	5	1	7	5	1	1	2	1	5	1	6	1	1	1	1	6	5	5	5	4	1	2	4	4	4	1	7	1	5	1
1	1	3	6	1	4	1	2	2	1	5	5	5	7	7	7	7	5	2	1	4	1	4	4	4	4	4	1	1	1	3	4	3	1	1	4	2	1	1	3	5	4	5	2	3	1	6	1	4	1
1	6	5	6	6	5	2	2	4	1	2	2	2	3	1	2	2	30	5	4	7	4	5	6	5	4	4	2	4	3	6	2	5	3	2	5	6	4	5	1	5	5	5	1	3	1	4	1	4	1
1	5	5	6	5	5	4	1	4	1	1	1	1	4	4	3	1	15	2	5	5	4	5	5	5	4	1	4	4	4	5	4	5	4	4	5	5	2	2	3	5	4	5	5	1	1	7	1	7	1
1	7	6	7	7	7	6	1	6	1	1	1	1	1	1	2	1	90	4	2	7	6	7	7	7	5	7	2	6	4	5	7	5	4	4	5	6	4	4	5	4	4	3	2	6	7	7	1	5	7
1	3	3	3	5	3	4	5	1	2	5	5	3	5	5	5	5	30	5	6	6	5	6	6	6	6	6	6	6	6	6	6	6	3	3	6	6	3	5	6	3	3	3	5	1	1	7	3	6	1
1	5	5	4	5	4	7	1	7	1	1	1	1	1	1	1	1	20	5	5	6	5	7	6	7	6	6	3	6	3	6	6	4	3	3	6	6	2	4	3	5	5	5	5	5	3	6	4	3	1
1	3	6	5	3	5	3	6	2	2	2	5	1	5	2	4	5	30	5	3	6	5	6	6	6	6	5	3	6	5	6	5	5	5	4	6	5	3	5	3	6	4	5	3	3	1	6	1	4	1
1	6	6	6	5	6	7	1	6	1	1	1	1	1	1	1	1	10	1	1	6	1	5	6	5	1	5	1	2	1	5	5	3	1	1	5	2	1	2	6	2	2	3	2	2	2	5	2	2	1
1	5	4	3	3	6	6	1	6	1	1	1	1	1	1	1	1	5	5	5	7	3	7	5	6	5	6	1	5	2	6	3	5	3	3	6	5	2	5	5	3	2	3	5	5	1	6	1	6	1
1	5	4	4	3	6	5	6	2	5	3	3	4	6	7	6	6	60	4	7	7	4	7	5	7	7	7	3	5	5	7	7	5	5	4	7	5	4	4	3	5	3	4	5	6	5	6	4	4	5
1	5	3	5	6	5	6	2	5	1	2	1	1	2	3	3	2	1	1	3	5	4	5	5	5	4	5	3	5	5	5	7	5	5	3	5	3	3	2	7	1	1	1	3	1	1	7	1	4	1
1	3	3	3	2	4	1	5	1	1	5	5	2	6	2	5	2	30	3	2	3	3	7	7	7	7	7	3	2	5	5	6	3	5	5	6	2	1	2	3	5	2	2	5	5	4	7	3	6	3
1	1	2	5	3	3	1	5	2	4	7	5	4	5	6	6	7	120	4	2	4	3	5	4	3	5	4	3	5	3	5	1	3	3	3	5	5	2	5	3	3	4	4	1	4	1	7	2	5	1
1	6	5	5	3	5	4	3	3	2	4	5	6	3	3	3	5	30	3	6	7	7	7	7	7	7	7	7	7	7	7	7	7	7	7	7	3	2	2	5	3	3	4	1	1	1	6	1	6	1
1	4	5	5	3	4	3	1	1	1	1	1	1	1	1	1	1	20	4	5	7	6	7	7	7	7	7	7	7	5	7	7	6	7	4	7	2	1	3	3	5	3	4	5	3	2	7	1	5	1
1	6	5	6	4	6	7	1	7	1	1	2	2	3	1	1	1	15	3	4	7	4	7	7	6	5	5	2	5	4	5	6	3	3	2	5	4	4	4	5	4	3	4	4	3	3	6	2	6	2
1	3	1	3	1	3	1	6	1	6	6	3	3	5	5	5	5	5	2	1	4	2	4	3	4	2	3	1	2	1	4	4	2	1	1	3	2	1	3	5	3	1	6	3	1	1	6	1	4	1
1	1	5	6	1	3	1	6	2	1	4	5	3	6	4	6	6	60	5	4	7	7	7	7	7	7	7	3	7	4	7	7	7	5	6	7	7	5	7	6	3	3	6	2	5	2	7	2	7	2
1	3	3	4	2	4	3	6	3	6	1	1	1	1	1	1	1	30	5	6	5	5	6	5	2	5	6	6	6	5	6	1	3	4	6	4	5	4	7	4	3	5	4	3	4	3	5	2	5	2
1	5	5	4	4	6	7	1	7	1	1	1	1	1	1	1	1	15	4	3	7	6	7	7	7	7	6	3	7	4	7	7	6	4	5	7	6	4	5	3	4	4	5	3	4	3	6	4	7	2
1	1	3	1	2	1	2	2	1	3	4	5	4	6	6	7	6	20	4	4	6	6	5	6	6	4	6	2	4	2	6	5	5	2	2	6	4	4	4	4	4	4	4	4	5	4	5	3	5	4
1	3	6	3	3	5	5	1	5	1	1	1	1	1	1	1	1	30	4	6	5	3	7	5	5	5	5	6	5	5	5	4	4	4	4	6	5	4	5	2	4	4	5	3	5	4	6	3	4	3
1	6	5	6	5	6	6	1	7	1	1	1	1	1	1	1	1	60	6	7	7	7	7	7	7	7	7	7	7	7	7	7	7	7	6	7	7	6	7	2	6	6	6	6	7	4	6	2	5	3
1	1	1	3	1	2	5	4	5	2	2	1	2	1	1	1	1	30	5	7	7	7	7	7	7	7	7	7	7	7	7	7	6	6	7	7	6	3	5	2	4	3	3	3	4	1	7	1	6	1
1	4	4	4	2	4	4	5	4	4	5	7	6	6	4	6	6	120	7	5	3	3	5	4	4	4	5	3	3	4	5	5	4	4	3	5	2	1	2	5	2	2	1	1	3	1	6	1	5	1
1	5	5	5	4	5	6	2	5	1	4	3	5	4	4	4	4	25	5	6	6	6	2	6	6	6	1	5	6	6	6	2	2	2	2	6	5	4	5	3	6	6	5	1	3	1	7	1	6	1
1	4	4	5	4	4	2	6	3	5	2	5	2	5	6	3	2	30	4	7	1	5	7	4	6	6	5	5	4	4	6	4	4	5	5	4	6	2	6	2	6	2	6	1	4	1	7	1	1	1
1	5	4	4	2	6	5	2	6	1	1	3	1	1	1	1	1	45	5	5	7	6	6	7	7	5	6	4	7	5	6	7	5	5	5	6	5	2	5	5	4	3	3	3	2	2	7	1	5	1
1	5	1	6	5	5	6	1	6	1	1	1	1	1	1	1	1	20	4	6	7	6	7	7	7	7	7	3	7	5	7	6	4	6	4	7	5	2	5	3	5	4	4	3	4	2	6	2	4	1
1	1	5	6	6	3	1	7	2	5	1	1	1	6	3	5	6	60	4	7	7	7	7	7	7	7	7	6	7	6	7	7	7	7	7	7	2	2	2	1	6	5	5	3	2	1	7	3	2	1
1	2	4	3	4	4	5	1	5	1	1	1	1	2	3	1	3	60	5	2	4	2	6	5	5	5	3	1	1	1	5	4	5	1	1	5	6	1	5	4	2	3	2	1	1	1	7	1	5	1
1	2	5	6	2	6	3	5	2	5	5	5	4	6	6	7	7	60	4	3	7	3	7	5	6	3	5	1	5	3	4	6	4	2	4	5	5	3	5	3	5	2	4	4	1	1	6	1	4	1
1	1	4	5	1	4	5	2	6	2	1	5	1	1	1	1	1	30	4	7	7	5	7	7	7	7	7	7	7	5	7	7	7	5	4	7	6	3	5	3	4	3	5	5	6	5	6	1	4	1
1	6	6	6	6	7	4	6	4	1	6	3	2	2	2	4	3	15	5	1	6	5	7	5	5	2	7	3	6	1	5	6	2	1	5	6	6	4	5	6	2	1	2	5	3	1	7	1	7	1
1	4	4	5	3	5	7	1	6	1	1	1	1	1	1	1	1	30	4	7	7	4	7	7	7	7	7	7	7	7	7	7	7	7	7	7	3	3	3	6	3	3	3	5	4	4	6	3	3	2
1	3	2	1	5	4	5	1	3	1	1	1	1	2	3	4	2	25	3	2	6	2	6	6	1	1	4	3	5	1	2	3	3	1	1	3	3	1	3	2	5	6	6	5	2	4	6	3	6	2
1	2	3	4	2	2	2	5	2	3	1	2	2	6	7	7	6	60	5	5	6	5	7	7	7	6	7	3	6	6	6	7	5	5	3	7	6	3	6	3	3	4	3	4	6	3	7	2	6	2
1	4	3	5	4	4	1	2	1	2	2	2	1	5	3	3	5	30	5	5	7	6	7	7	7	7	7	5	6	6	7	6	5	6	5	7	7	5	6	5	3	3	3	6	1	1	7	1	7	1
1	4	2	5	7	4	3	2	4	1	2	2	1	1	1	2	2	40	5	6	7	7	7	7	7	7	7	4	7	4	7	7	6	5	4	7	5	4	5	3	5	4	5	2	2	2	6	1	6	2
1	3	4	3	4	6	7	1	5	1	1	2	1	1	1	1	1	1	1	1	2	1	2	2	3	1	2	1	2	1	2	3	2	1	1	2	1	1	2	4	3	5	4	2	2	3	6	1	7	6
1	6	6	7	6	7	7	1	7	1	1	1	1	1	1	1	1	30	6	6	6	2	7	7	7	7	6	6	6	2	6	2	6	2	2	7	6	2	5	6	6	5	6	2	2	1	6	1	2	2
1	4	4	3	4	3	5	1	6	1	1	1	1	3	1	1	1	10	3	5	7	5	7	7	6	5	6	3	5	3	4	5	5	4	3	5	4	2	1	5	3	2	2	5	4	5	6	5	6	5
1	3	3	6	3	5	3	5	4	3	3	3	2	2	5	4	4	2	2	2	3	2	3	3	2	1	3	1	2	2	3	2	2	2	2	3	2	2	1	4	2	3	2	2	1	2	6	1	4	2
1	5	5	7	4	7	7	1	7	1	1	1	1	1	1	1	1	5	1	4	7	4	7	7	4	1	7	1	4	1	4	4	4	4	4	4	2	1	2	4	3	4	3	2	3	2	7	3	7	1
1	4	3	4	4	4	4	6	2	5	4	3	3	2	2	2	1	90	5	6	7	7	6	6	7	6	6	5	7	6	7	6	5	6	4	7	6	2	6	5	3	3	3	3	4	3	6	2	5	2
1	6	5	5	2	6	2	4	2	3	6	6	6	7	7	6	6	30	2	4	6	6	6	4	6	5	6	5	2	3	6	6	5	4	2	5	3	1	2	5	3	4	4	4	3	4	7	2	3	2
1	3	5	5	2	5	5	1	4	1	1	2	1	1	2	1	1	60	5	3	6	5	7	7	7	6	6	2	5	6	7	7	3	2	1	7	6	4	5	5	4	3	3	2	2	2	5	1	6	4
1	2	1	2	2	2	1	3	2	3	2	1	1	1	1	1	3	15	5	4	5	3	6	6	6	5	4	3	3	5	6	4	4	3	2	5	5	2	4	2	5	5	5	3	2	1	6	1	6	1
1	1	1	1	1	2	7	1	2	1	1	1	1	3	1	1	1	60	5	4	6	4	7	6	7	5	7	4	6	3	7	7	7	4	4	7	5	3	4	2	4	3	4	6	2	2	6	2	4	2
1	6	7	6	5	5	5	1	4	1	1	1	1	3	6	1	1	25	5	6	7	5	6	7	6	5	5	1	5	2	6	6	7	3	4	5	6	3	5	4	5	4	4	4	3	5	7	2	5	3
1	4	5	5	5	5	4	2	3	1	1	2	1	6	2	2	2	10	4	5	7	5	7	6	7	5	5	2	7	1	5	7	5	1	2	6	5	3	5	2	6	3	4	4	2	2	6	2	2	1
1	5	3	6	4	4	4	7	4	5	1	3	1	5	5	2	2	5	3	4	7	7	7	7	7	7	6	5	7	4	7	6	7	6	3	7	5	4	5	4	6	5	5	6	4	3	5	1	2	4
1	7	6	3	4	6	7	1	7	1	1	1	1	1	4	1	1	60	5	6	6	4	6	7	7	6	5	6	5	3	6	6	6	5	6	6	6	4	6	2	6	5	3	5	3	4	7	2	4	3
1	6	4	5	2	4	6	1	6	1	1	1	1	1	1	1	1	20	4	5	1	3	2	6	4	6	1	6	4	2	4	2	6	6	5	6	6	2	3	2	5	3	4	4	4	1	7	1	5	1
1	4	3	6	6	5	4	1	4	1	1	1	1	4	1	1	4	20	4	1	1	1	7	2	5	6	2	1	4	2	6	6	6	1	6	5	4	3	2	3	4	2	2	4	3	1	7	3	6	1
1	5	3	5	5	6	5	4	4	1	1	5	1	4	4	1	1	20	3	1	2	1	2	2	2	1	2	1	3	1	6	1	2	1	1	4	1	1	1	7	1	1	1	4	1	1	7	1	1	1
1	5	4	4	5	6	6	2	5	1	1	2	1	2	1	1	1	15	4	5	6	2	5	6	7	5	6	2	5	3	6	5	4	2	2	6	5	4	4	3	4	3	2	2	2	1	7	1	7	1
1	4	6	7	7	5	7	5	1	2	1	7	4	5	7	4	5	10	4	7	7	7	4	7	7	7	7	7	7	7	7	7	7	7	7	7	5	4	4	4	4	4	4	4	5	5	5	4	5	5
1	4	4	6	4	5	3	4	2	2	4	3	5	6	6	4	6	3	2	2	2	1	2	3	3	3	2	1	1	2	3	3	1	1	1	3	2	1	1	6	2	2	2	2	3	3	5	1	4	3
1	6	2	5	5	5	6	3	5	1	3	3	2	3	1	2	2	10	4	2	7	2	7	7	6	5	6	2	5	2	6	5	4	2	3	6	5	3	5	4	5	5	4	2	2	2	5	1	5	2
1	1	4	6	1	4	6	1	5	1	1	1	1	1	1	1	1	20	4	2	3	1	5	4	4	2	1	3	4	4	2	4	2	2	2	4	4	2	2	2	5	2	3	3	2	1	7	1	4	1
1	2	1	4	2	5	5	6	2	1	2	5	4	6	7	6	6	30	5	3	7	5	7	5	7	7	7	5	6	4	6	5	6	5	5	7	6	4	6	6	3	3	3	3	3	1	6	1	5	2
1	6	7	7	7	6	7	1	6	2	1	2	2	2	1	1	1	30	5	1	6	2	6	6	6	2	6	2	2	2	4	4	2	2	3	4	5	1	2	3	4	3	3	3	2	2	4	1	4	2
1	3	3	3	2	3	1	7	1	5	5	6	6	6	7	6	6	60	5	3	3	2	3	3	3	1	3	1	2	1	5	2	3	1	2	3	5	4	4	7	2	2	2	5	2	1	7	1	2	2
1	6	6	2	5	6	6	1	7	1	1	4	1	1	1	1	2	1	1	1	3	2	2	1	2	1	1	2	2	2	1	2	1	1	2	3	1	2	1	7	3	2	2	1	1	1	6	1	6	1
1	6	5	5	6	5	5	1	5	6	1	1	1	1	1	1	1	5	3	4	3	4	5	6	5	4	3	2	3	1	5	5	3	5	2	5	3	2	3	4	4	5	3	2	2	2	6	2	5	2
1	1	4	3	7	7	7	1	7	1	1	1	1	1	4	1	1	15	3	1	6	1	6	6	5	2	3	1	1	1	5	6	3	1	1	3	3	2	2	5	3	1	2	3	2	3	5	2	2	3
1	5	4	6	3	6	4	1	5	1	1	1	2	1	1	2	1	60	4	3	5	6	7	4	5	5	5	4	2	1	6	3	3	1	2	5	4	2	2	3	4	5	3	1	1	1	3	1	1	1
1	7	3	7	4	7	7	2	7	2	1	1	1	1	1	1	1	10	3	2	7	5	6	7	5	5	6	3	5	5	6	4	5	4	4	5	4	2	4	2	4	5	5	5	1	1	7	1	5	1
1	3	3	4	4	4	3	3	3	4	5	4	4	3	3	3	4	15	3	3	5	4	5	5	5	5	3	2	3	3	6	4	5	2	2	5	5	4	4	4	2	2	3	3	2	2	2	1	2	1
1	5	4	5	5	4	5	1	6	2	1	2	1	1	1	2	1	15	3	2	5	4	5	5	5	3	5	1	4	1	4	5	2	1	1	5	2	2	3	6	2	2	2	2	1	2	4	1	5	3
1	1	4	2	1	3	7	1	7	1	1	1	1	1	1	1	1	60	5	5	7	6	7	7	7	7	7	5	7	6	7	7	5	4	3	7	6	3	5	2	6	6	4	5	5	2	7	5	7	1
1	6	6	7	7	7	7	1	7	7	1	2	1	1	1	1	1	60	6	5	7	3	7	7	7	7	7	6	7	6	7	7	5	4	6	7	6	4	5	2	5	5	6	7	5	5	7	2	5	5
1	3	3	7	3	3	4	2	4	3	5	2	2	2	2	2	2	3	1	1	2	3	4	3	3	2	3	1	4	1	5	3	1	1	2	4	1	1	1	7	1	1	1	2	4	2	6	1	5	2
1	3	2	4	3	5	2	5	2	5	4	1	3	5	6	6	6	20	6	2	6	5	5	6	6	2	3	1	5	2	6	6	2	2	2	5	6	5	5	2	6	6	4	3	5	2	6	1	3	1
1	3	3	4	3	4	5	1	5	1	2	1	1	3	2	2	1	5	3	2	6	3	3	3	6	4	6	3	3	2	5	5	5	2	3	5	2	1	2	4	3	3	3	3	4	2	7	1	7	2
1	2	5	3	3	3	4	6	5	3	1	3	2	2	1	1	1	20	3	2	6	4	5	6	6	4	5	3	4	4	4	6	5	3	2	5	2	2	2	4	4	1	3	3	2	1	6	2	5	1
1	4	5	4	4	5	6	1	7	1	1	1	1	1	1	1	1	5	2	1	5	1	4	5	5	1	2	1	2	1	4	5	3	1	1	3	1	1	1	7	2	2	1	1	3	2	6	1	3	3
1	3	3	6	3	5	3	6	3	2	2	3	3	5	3	5	5	7	5	4	6	3	6	6	2	2	5	2	2	2	5	4	3	4	2	3	5	3	4	5	5	3	3	3	5	1	7	2	2	1
1	1	1	3	1	2	1	4	2	3	6	4	1	4	3	2	3	10	4	2	7	3	7	7	6	6	7	2	5	2	7	3	4	3	3	7	5	3	4	2	5	3	4	5	2	1	6	1	6	1
1	5	6	4	6	4	4	1	4	1	1	3	2	1	1	1	1	2	2	1	3	3	3	3	3	2	3	1	4	1	3	3	2	1	1	3	2	2	2	6	3	2	2	2	2	1	5	1	4	1
1	6	5	4	4	5	5	1	5	1	1	2	2	1	1	1	1	20	5	3	5	3	6	5	7	5	6	2	4	2	3	5	5	5	2	4	6	4	4	2	6	4	4	2	1	1	5	1	2	1
1	5	6	5	5	6	2	1	4	2	1	2	1	5	4	1	2	90	7	5	7	7	7	7	7	7	7	6	7	7	7	7	7	7	7	7	7	2	2	2	6	4	3	6	4	5	7	7	6	3
1	5	3	6	3	5	6	2	5	2	1	3	3	6	3	3	4	45	5	6	7	7	7	7	6	6	7	6	7	6	7	7	6	5	5	7	6	4	4	3	3	3	3	5	3	3	6	2	2	4
1	3	3	4	3	5	2	1	2	1	1	1	1	1	2	1	1	5	2	1	5	3	6	6	4	3	6	1	4	2	3	4	3	2	2	5	4	2	2	1	3	2	2	3	2	1	7	2	7	1
1	2	3	2	1	3	2	1	2	1	2	1	1	1	1	2	2	5	4	4	7	7	7	7	7	7	7	1	7	2	7	7	7	7	7	7	3	2	3	5	2	5	3	6	2	1	7	1	1	1
[truncated: 97 more columns]
